# Supplementary material for: Mutated CCDC51 Coding for a Mitochondrial Protein, MITOK Is a Candidate Gene Defect for Autosomal Recessive Rod-Cone Dystrophy
Source: MDPI journal article supplement (doi:10.3390/ijms22157875), 2021-07-23
Supplement: s1 [file s1]

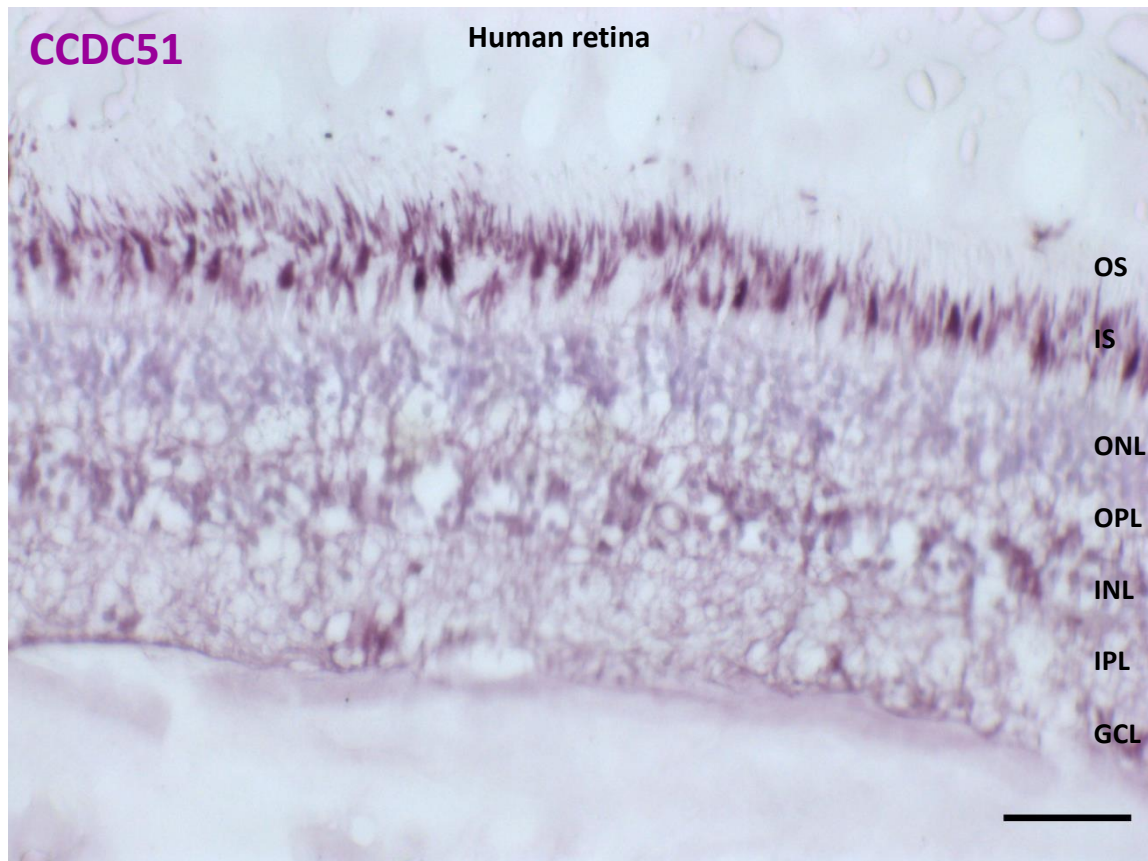

**Figure S1: CCDC51 detection by immunochemistry with horseradish peroxidase on human retina.**

CCDC51 was detected in the inner segments of the photoreceptors in the human retina using horseradish peroxidase labelling (bar = 50 $\mu$ m). OS = outer segments, IS = inner segments, ONL = outer nuclear layer, OPL = outer plexiform layer, INL = inner nuclear layer; IPL = inner plexiform layer, GCL = ganglion cell layer.

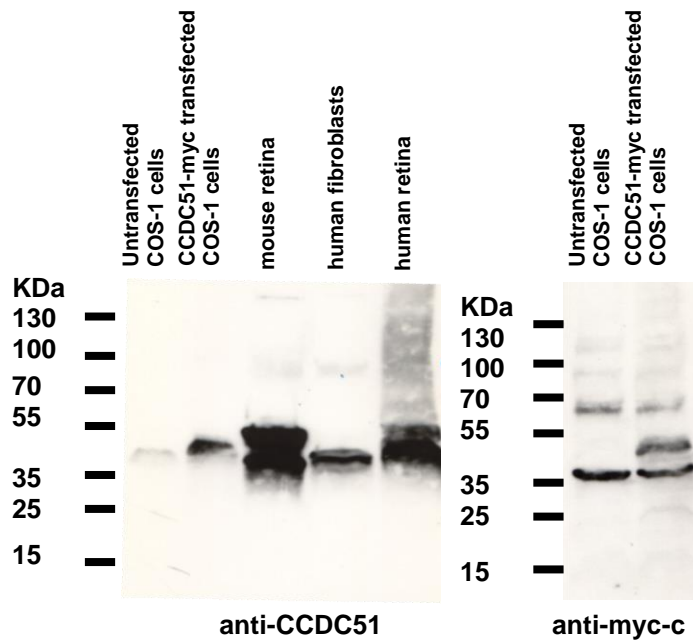

**Figure S2: CCDC51 detection by Western blot analyses in cell lines, mouse and human retina.**

CCDC51 was detected in CCDC51-c-myc COS-1 transfected cells at the expected size of ~45 kDa. At a lower amount, endogenous CCDC51 was also detected in untransfected COS-1 cells. As a control, the same protein extracts were stained with anti-c-myc antibody revealing a specific band at the same size, only in transfected cells. Human fibroblast cells reveal as well one specific band at the expected size of ~45 kDa. In contrast mouse and human retina reveal two bands with a slightly different molecular weight.

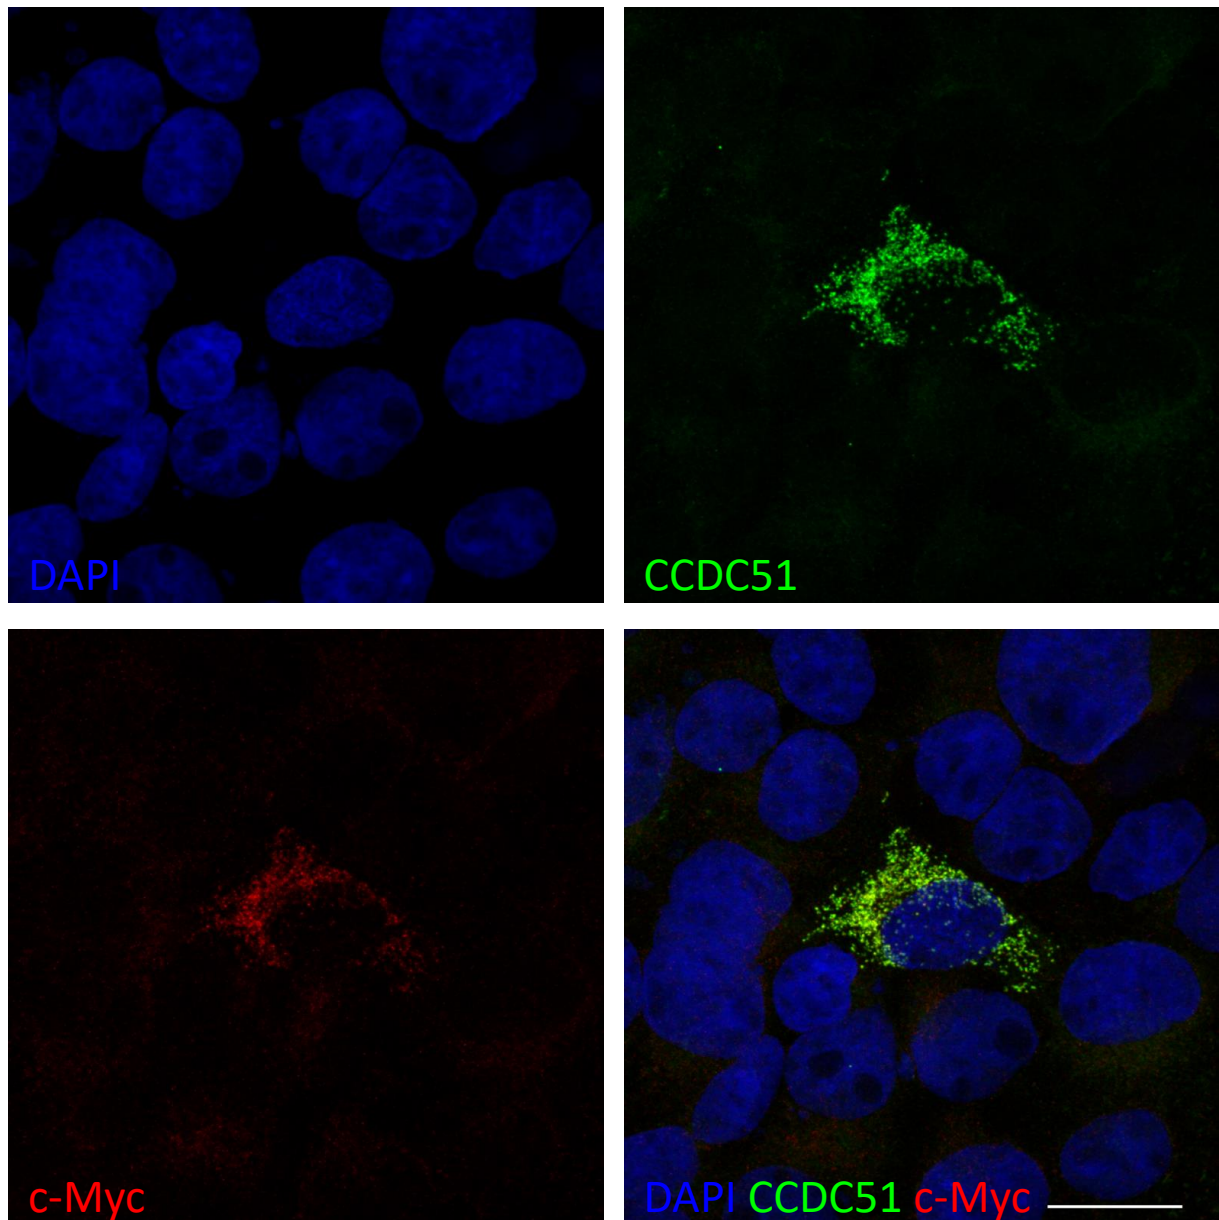

**Figure S3: Antibody test on CCDC51 overexpressing COS-1 cells.**

(a) The staining of the rabbit anti-CCDC51 (1:100) and the anti-c-myc (1:500) antibodies visualized with secondary donkey anti-rabbit conjugated with Alexa Fluor 488 (green, 1:1000) and donkey anti-mouse with Cy3 (red, 1:1000) antibodies with nuclei stained with DAPI (blue) visualized with a fluorescent microscope (DM6000 B, Leica, Wetzlar, Germany) (1:1000) overlapped in a dotted pattern (yellow) in COS-1 cells overexpressing CCDC51 (bar = 20 $\mu$ m).

**S1 Table: *CCDC51* (NM\_001256964.1) variants found heterozygous in patients with rod-cone dystrophy but with no second variant.**

| Patient #      | Exon | Variant                                        | Conservation                                                                                                                                                                                                            | Minor Allele frequency                                                                                                                                                                                  | Polyphen 2           | SIFT        | Mutation Taster    | CNV by qPCR |
|----------------|------|------------------------------------------------|-------------------------------------------------------------------------------------------------------------------------------------------------------------------------------------------------------------------------|---------------------------------------------------------------------------------------------------------------------------------------------------------------------------------------------------------|----------------------|-------------|--------------------|-------------|
| CIC05511_F630  | 3    | c.416G>A<br>p.(Arg139His)<br>, rs752727840     | 97/97                                                                                                                                                                                                                   | ExAc:<br>ALL:A=0.0028%-<br>AFR:0.020%-<br>AMR:0%-EAS:0%-<br>SAS:0%-<br>NFE:0.0027%-<br>FIN:0.0045%-<br>OTH:0%,<br>ESP/EVS not found<br>gnomAD:<br>7/246150,<br>0 homozygous<br>0.00002844               | Probably<br>damaging | Deleterious | Disease<br>causing | No          |
| CIC08015_F4473 | IV3  | c.477+16G>A<br>p.?                             | 10/54<br>show A in<br>Bushbaby,<br>Lesse<br>Egyptian<br>Jerboa,<br>Chinese<br>and Gold<br>Hamster,<br>mouse, rat,<br>hedgehog,<br>cape<br>elephant<br>shrew,<br>lizard,<br>stickleback<br>and 1/54<br>C in<br>armadillo | never reported                                                                                                                                                                                          | n.a.                 | n.a.        | n.a.               | No          |
| CIC08507_F4807 | 4    | c.508C>T,<br>p.(Arg170Cys)<br>,<br>rs146932588 | 44/100<br>different<br>amino<br>acids but<br>never Cys                                                                                                                                                                  | ExAC:<br>ALL:T=0.0029%-<br>AFR:0.0067%-<br>AMR:0%-EAS:0%-<br>SAS:0%-<br>NFE:0.0055%-<br>FIN:0%-OTH:0%<br>ESP/EVS:EA:<br>A=0.04% - AA:<br>A=0.00%<br>gnomAD:<br>8/274218,<br>0 homozygous,<br>0.00002917 | Possibly<br>damaging | Tolerated   | Disease<br>causing | No          |

**S2 Table: *CCDC51* oligonucleotide primers used for quantitative PCR experiments**

| Name                   | Oligonucleotide sequence      |
|------------------------|-------------------------------|
| CCDC51_ex1.1F          | 5'-CTGAGTGGCAGACGATTGGT-3'    |
| CCDC51_ex1.1R          | 5'-CTGTCTACCTGCAGTGCTCT-3'    |
| CCDC51_ex2-1F          | 5'-GTCCCCCTCACAGATCTCA-3'     |
| CCDC51_ex2.1R          | 5'- CCACCTCCTCAGGTCTTTTC -3'  |
| CCDC51_ex2cDNAF        | 5'-CACAGCATTGAGCAACGAGC-3'    |
| CCDC51_ex2.2R          | 5'- CACCTCTGTCACCTTTCCCT -3'  |
| CCDC51_ex3.1F          | 5'-CTCCGGTTTTCTCTTTGCAG-3'    |
| CCDC51_ex3.1R          | 5'- GCTCGAGAGTAGCCAGTTCC -3'  |
| CCDC51_ex4.1F          | 5'-CACCTTGTGCCCATGTAATC-3'    |
| CCDC51_ex4.1R          | 5'-GCGCTCCTTCTCATGACTTT-3'    |
| CCDC51_ex4.2F          | 5'- CCACAATCTCATGGTGGACTT -3' |
| CCDC51_ex4.2R          | 5'- ATGGACTTGCCTGGAATGAC -3'  |
| CCDC51_ex4.3F          | 5'- GGTTTCAGCTTGTAAGTCTGC -3' |
| CCDC51_ex4.3R<br>(4bR) | 5'- GATGGTGTTCCTGTTGACTTG -3' |
| CCDC51_ex4.4F          | 5'- CCACACTGCCTGTGCTCTA -3'   |
| CCDC51_ex4.4R          | 5'- GCTCCTTCAGATTGAGGTTG -3'  |
| GAPDH_F_QPCR           | 5'- CTCCCCACACACATGCACTTA-3'  |
| GAPDH_R_QPCR           | 5'- TTGCCAAGTTGCCTGTCCTT-3'   |

**S3 Table: Variants found heterozygous in human retina, universal tissue and fibroblasts compared to human *CCDC51* (NM\_001256964.1)**

| # | Nucleotide exchange | Amino acid exchange | Reference                                                                                                                                                                                                                                                                    | Conclusion   |
|---|---------------------|---------------------|------------------------------------------------------------------------------------------------------------------------------------------------------------------------------------------------------------------------------------------------------------------------------|--------------|
| 1 | c.805T>C            | p.(Leu269Leu)       | rs2279077<br>ExAc :<br>ALL:C=37.83%<br>-AFR:27.35% -<br>AMR:22.64% -<br>EAS:30.90% -<br>SAS:32.50% -<br>NFE:45.23% -<br>FIN:39.17% -<br>OTH:39.37%<br>ESP: EA:<br>G=46.56% -<br>AA: G=26.92%<br>gnomAD:<br>104672/276646<br>with 20920<br>homozygous<br>Frequency:<br>0.3784 | Polymorphism |

**S4 Table: Variants found homozygous in COS-1 cells compared to human *CCDC51* (NM\_001256964.1)**

| #  | Nucleotide exchange | Amino acid exchange | Reference                                                                                                                                                                                                | Nucleotide or amino acid exchange occurs in <i>Chlorocebus sabaeus</i> green monkey genome |
|----|---------------------|---------------------|----------------------------------------------------------------------------------------------------------------------------------------------------------------------------------------------------------|--------------------------------------------------------------------------------------------|
| 1  | c.770G>T            | p.(Arg257Leu)       | -                                                                                                                                                                                                        | yes                                                                                        |
| 2  | c.810G>A            | p.(Arg270Arg)       | -                                                                                                                                                                                                        | yes                                                                                        |
| 4  | c.735A>G            | p.(Gln245Gln)       | -                                                                                                                                                                                                        | yes                                                                                        |
| 5  | c.711G>A            | p.(Ala237Ala)       | -                                                                                                                                                                                                        | yes                                                                                        |
| 6  | c.696T>C            | p.(Ala232Ala)       | -                                                                                                                                                                                                        | yes                                                                                        |
| 7  | c.678A>G            | p.(Arg226Arg)       | -                                                                                                                                                                                                        | yes                                                                                        |
| 8  | c.675G>C            | p.(Val225Val)       | rs771909567<br>ExAc :<br>ALL:C=0.00041<br>%-AFR:0% -<br>AMR:0% -<br>EAS:0.0058% -<br>SAS:0% -<br>NFE:0% -<br>FIN:0% -<br>OTH:0%<br>gnomAD:<br>1/246098 with 0<br>homozygous<br>Frequency:<br>0.000004063 | yes                                                                                        |
| 9  | c.633G>A            | p.(Gly211Gly)       | -                                                                                                                                                                                                        | yes                                                                                        |
| 10 | c.591T>G            | p.(Ala197Ala)       | -                                                                                                                                                                                                        | yes                                                                                        |
| 11 | c.534G>A            | p.(Lys178Lys)       | -                                                                                                                                                                                                        | yes                                                                                        |

|    |          |               |   |     |
|----|----------|---------------|---|-----|
| 12 | c.528A>C | p.(Arg176Arg) | - | yes |
| 13 | c.489G>A | p.(Arg163Arg) | - | yes |

## S5 Table: Mutations in mtDNA and nDNA mitochondrial genes leading to a retinal phenotype

### S5.1 Table Mutations in mtDNA mitochondrial genes leading to a retinal phenotype

| Symbols                                                              | Disease                                                                                                                                                                                                   | Impact on mitochondrial proteins         | References |
|----------------------------------------------------------------------|-----------------------------------------------------------------------------------------------------------------------------------------------------------------------------------------------------------|------------------------------------------|------------|
| <i>KSS</i> (MIM: 530000)                                             | Kearns-Sayre syndrome, including retinal pigmentary degeneration and one or more of the following: cardiac conduction abnormality, cerebrospinal fluid abnormalities or cerebella dysfunction             | Several mitochondrial proteins           | [47, 48]   |
| <i>LHON</i> (MIM: 535000)                                            | Leber hereditary optic neuropathy                                                                                                                                                                         | complex I, III or IV                     | [49-57]    |
| <i>MT-TL1</i> , <i>DMDF</i> , <i>TRNL 1</i> (MIM: 520000 and 590050) | macular pattern dystrophy with type II diabetes and deafness                                                                                                                                              | leucine tRNA 1 (UUA/G), nt 3230-3304     | [58-62]    |
| <i>MT-ATP6</i> , <i>ATP6</i> , <i>NARP</i> (MIM: 516060 and 551500)  | retinitis pigmentosa with developmental and neurological abnormalities; Leigh syndrome; Leber hereditary optic neuropathy (developmental delay, neuropathy, ataxia and RP, with or without optic atrophy) | complex V ATPase 6 subunit, nt 8527-9207 | [63-66]    |
| <i>MT-TH</i> , <i>TRNH</i> (MIM: 590040)                             | pigmentary retinopathy and sensorineural hearing loss, cardiomyopathy                                                                                                                                     | histidine tRNA, nt 12138-12206           | [67]       |
| <i>MT-TS2</i> , <i>TRNS2</i> (MIM: 500004 and 590085)                | retinitis pigmentosa with progressive sensorineural hearing loss                                                                                                                                          | tRNA 2 (AGU/C), nt 12207-12265           | [68]       |
| <i>MT-TP</i> , <i>TRNP</i> (MIM: 590075)                             | retinitis pigmentosa with deafness and                                                                                                                                                                    | proline tRNA, nt 15955-16023             | [69]       |

|  |                                                               |  |  |
|--|---------------------------------------------------------------|--|--|
|  | neurological abnormalities, Parkinson disease and/or myopathy |  |  |
|--|---------------------------------------------------------------|--|--|

#### S5 1.2 Mutations in nDNA mitochondrial genes leading to a retinal phenotype

| Symbols                                                                                  | Chromosomal localization | Disease                                                                                                                                                                                 | Impact on mitochondrial proteins                                                                                                                                           | References |
|------------------------------------------------------------------------------------------|--------------------------|-----------------------------------------------------------------------------------------------------------------------------------------------------------------------------------------|----------------------------------------------------------------------------------------------------------------------------------------------------------------------------|------------|
| <i>MFN2</i> , <i>CMT6</i> , <i>CMT2A2</i> , <i>MARF</i> (MIM: 608507, 609260 and 601152) | 1p36.22                  | dominant optic atrophy with neuropathy and myopathy; dominant Charcot-Marie-Tooth disease                                                                                               | mitofusin 2 is important for fusion of mitochondria and contributes to mitochondrial morphology and distribution                                                           | [70]       |
| <i>OPA1</i> (MIM: 125250, 165500 and 605290)                                             | 3q29                     | dominant optic atrophy, Kjer type; dominant optic atrophy with sensorineural hearing loss                                                                                               | OPA1 protein is a dynamin-related GTPase which localizes to mitochondria                                                                                                   | [71-84]    |
| <i>WFS1</i> , <i>DFNA38</i> (MIM: 222300 and 598500)                                     | 4p16.1                   | recessive, and dominant (low frequency) sensorineural hearing loss, include diabetes, optic atrophy, deafness, often associated with multiple mitochondrial deletions                   | Altered mitochondrial dynamics                                                                                                                                             | [85-93]    |
| <i>SLC25A46</i> , <i>CMT6B</i> and <i>HMSN6B</i> (MIM: 610826, 616505)                   | 5q22.1                   | recessive syndromic optic atrophy, variable neurologic findings including cerebellar ataxia, motor and sensory neuropathy, and pontocerebellar hypoplasia; symptoms are consistent with | solute carrier family 25 membrane protein is an integral component of the mitochondrial outer membrane and participates in mitochondrial function and mitochondrial fusion | [94, 95]   |



|                                                                                       |             |                                                                                                                                                           |                                                                                                                                                                                                                              |            |
|---------------------------------------------------------------------------------------|-------------|-----------------------------------------------------------------------------------------------------------------------------------------------------------|------------------------------------------------------------------------------------------------------------------------------------------------------------------------------------------------------------------------------|------------|
|                                                                                       |             | Charcot-Marie-Tooth disease and Leigh syndrome                                                                                                            |                                                                                                                                                                                                                              |            |
| <i>RTN4IP1</i> ,<br><i>OPA10</i> (MIM: 610502 and 616732)                             | 6q21        | recessive optic atrophy, non-syndromic and syndromic with or without further neurologic findings                                                          | reticulon 4 interacting protein is a mitochondrial ubiquinol oxydo-reductase protein important for the respiratory complex I and IV activities and involved in retinal ganglion cell function and neural-retinal development | [96]       |
| <i>TMEM126A</i> ,<br><i>OPA7</i> (MIM: 165500 and 612988, 612989)                     | 11q14       | syndromic optic atrophy                                                                                                                                   | TMEM126A is a mitochondrial located mRNA (MLR) protein of the mitochondrial inner membrane                                                                                                                                   | [97-99]    |
| <i>C12orf65</i> ,<br><i>COXPD7</i> ,<br><i>SPG55</i> (MIM: 613541, 613559 and 615035) | 12q24       | recessive spastic paraplegia, neuropathy and optic atrophy                                                                                                | chromosome 12 open reading frame 65 is a nuclear-encoded mitochondrial matrix protein involved in mitochondrial protein synthesis                                                                                            | [100, 101] |
| <i>OPA8</i> (MIM: 616648)                                                             | 16q21-q22.3 | dominant optic atrophy with late-onset sensorineural hearing loss, hearing loss, increased central conductance times and cardiac abnormalities, Kjer type | lack of functional <i>OPA8</i> protein leads to subsarcolemmal accumulations of mitochondria and slight increase in mtDNA content                                                                                            | [102]      |
| <i>OPA3</i> , MGA3 (MIM: 165300, 165500, 258501, 606580)                              | 19q13.32    | recessive optic atrophy with ataxia and 3-methylglutaconic aciduria; dominant optic atrophy with cataract, ataxia and                                     | <i>OPA3</i> plays a role in mitochondrial processes: <i>Opa3</i> binds to prohibitin, a molecular chaperone with additional roles in                                                                                         | [103-109]  |

|                                                                                         |        |                                                                                                                                                                                                                          |                                                                                                                                                                                                                                                                                                                                |           |
|-----------------------------------------------------------------------------------------|--------|--------------------------------------------------------------------------------------------------------------------------------------------------------------------------------------------------------------------------|--------------------------------------------------------------------------------------------------------------------------------------------------------------------------------------------------------------------------------------------------------------------------------------------------------------------------------|-----------|
|                                                                                         |        | areflexia, also called Costeff optic atrophy syndrome; symptoms related to 3-methylglutaconic aciduria include early-onset optic atrophy, cognitive deficit, extrapyramidal abnormalities, ataxia and spastic paraplegia | insulin/IGF-1 signaling and maintaining the integrity of the inner mitochondrial membrane. As a chaperone, prohibitin shuttles cardiolipin between the mitochondria and the nucleus; a form of inter-organelle communication that appears most important in tissues with high oxygen demands (e.g. the retinal pigment cells). |           |
| <i>IDH3B</i> , <i>RP46</i><br>(MIM: 268000, 604526, 612572)                             | 20p13  | Nonsyndromic recessive retinitis pigmentosa                                                                                                                                                                              | NAD(+)-specific isocitrate dehydrogenase (3 beta isocitrate dehydrogenase) catalyzes conversion of isocitrate to $\alpha$ -ketoglutarate in the citric acid cycle (Krebs cycle); the Krebs cycle, localized in mitochondria                                                                                                    | [110]     |
| <i>TIMM8A</i> , <i>DDP</i> , <i>DDP2</i> , <i>DFN1</i> (MIM: 300356, 304700 and 311150) | Xq22.a | optic atrophy with deafness-dystonia syndrome also known as Mohr-Tranebjaerg or Jensen syndrome                                                                                                                          | inner mitochondrial membrane translocase 8 homolog, protein involved in transport of metabolites into mitochondria                                                                                                                                                                                                             | [111-113] |

**S6 Table: Coverage and read depth from whole exome sequencing for the affected girl, CIC00834.**

| Chr   | Size of the target regions (bp) | 1X Coverage (%) | 4X Coverage (%) | 10X Coverage (%) | 25X Coverage (%) | Mean depth (X) |
|-------|---------------------------------|-----------------|-----------------|------------------|------------------|----------------|
| 1     | 4738564                         | 98.73           | 97.48           | 95.43            | 88.9             | 81.91          |
| 2     | 3471855                         | 98.96           | 98              | 96.37            | 90.61            | 85.34          |
| 3     | 2767223                         | 99.62           | 98.94           | 97.57            | 92.15            | 86.84          |
| 4     | 1871681                         | 99.36           | 98.48           | 97.15            | 91.2             | 86.12          |
| 5     | 2168450                         | 99.01           | 98.1            | 96.51            | 90.55            | 84.53          |
| 6     | 2470987                         | 98.48           | 97.49           | 95.89            | 90.26            | 85.86          |
| 7     | 2280798                         | 97.53           | 95.96           | 93.5             | 86.19            | 78.98          |
| 8     | 1642199                         | 97.9            | 96.85           | 95.05            | 88.85            | 80.91          |
| 9     | 1891158                         | 98.49           | 97.08           | 94.86            | 87.87            | 80.46          |
| 10    | 1873001                         | 98              | 96.99           | 95.32            | 89.04            | 80.45          |
| 11    | 2832686                         | 99.35           | 98.02           | 95.68            | 88.8             | 80.47          |
| 12    | 2618601                         | 99.3            | 98.32           | 96.42            | 89.73            | 81.87          |
| 13    | 859203                          | 99.4            | 98.61           | 97.19            | 91.27            | 82.55          |
| 14    | 1604688                         | 99.51           | 98.57           | 96.74            | 90.29            | 81.4           |
| 15    | 1672882                         | 97.22           | 95.95           | 93.95            | 87.68            | 79.94          |
| 16    | 2028152                         | 97.22           | 95.34           | 92.47            | 84.47            | 75.65          |
| 17    | 2735968                         | 98.57           | 96.9            | 94.1             | 86.29            | 76.74          |
| 18    | 741097                          | 99.15           | 98.12           | 96.39            | 90.48            | 83.27          |
| 19    | 3044127                         | 98.1            | 95.49           | 91.38            | 81.2             | 67.22          |
| 20    | 1171367                         | 99.05           | 97.73           | 95.54            | 88.87            | 79.65          |
| 21    | 480492                          | 99.26           | 98.21           | 96.11            | 89               | 78.65          |
| 22    | 1025109                         | 97.94           | 95.9            | 92.83            | 84.67            | 73.34          |
| X     | 1756723                         | 94.98           | 94.17           | 92.84            | 87.73            | 82.02          |
| Y     | 91440                           | 1.19            | 0.64            | 0.45             | 0.31             | 0.16           |
| Total | 47838451                        | 98.48           | 97.25           | 95.19            | 88.53            | 80.62          |

**S7 Table: Coverage and read depth from whole exome sequencing for the unaffected brother, CIC04408.**

| Chr   | Size of the target regions (bp) | 1X Coverage (%) | 4X Coverage (%) | 10X Coverage (%) | 25X Coverage (%) | Mean depth (X) |
|-------|---------------------------------|-----------------|-----------------|------------------|------------------|----------------|
| 1     | 4738564                         | 98.66           | 97.38           | 95.16            | 87.76            | 76.22          |
| 2     | 3471855                         | 98.88           | 97.88           | 96.07            | 89.14            | 78.28          |
| 3     | 2767223                         | 99.6            | 98.88           | 97.33            | 90.75            | 80.33          |
| 4     | 1871681                         | 99.34           | 98.41           | 96.78            | 89.42            | 78.29          |
| 5     | 2168450                         | 99.03           | 97.97           | 96.1             | 88.92            | 77.57          |
| 6     | 2470987                         | 98.43           | 97.37           | 95.6             | 89               | 79.22          |
| 7     | 2280798                         | 97.4            | 95.81           | 93.24            | 85.01            | 73.32          |
| 8     | 1642199                         | 97.88           | 96.78           | 94.7             | 87.18            | 74.52          |
| 9     | 1891158                         | 98.4            | 96.98           | 94.57            | 86.81            | 75.3           |
| 10    | 1873001                         | 97.98           | 96.85           | 95               | 87.6             | 74.58          |
| 11    | 2832686                         | 99.28           | 97.99           | 95.53            | 87.93            | 75.62          |
| 12    | 2618601                         | 99.27           | 98.27           | 96.18            | 88.46            | 75.79          |
| 13    | 859203                          | 99.31           | 98.53           | 96.94            | 89.58            | 75.13          |
| 14    | 1604688                         | 99.43           | 98.54           | 96.49            | 88.88            | 75.32          |
| 15    | 1672882                         | 97.1            | 95.8            | 93.65            | 86.39            | 74.6           |
| 16    | 2028152                         | 97.21           | 95.24           | 92.28            | 83.76            | 71.92          |
| 17    | 2735968                         | 98.56           | 96.87           | 93.97            | 85.44            | 72.87          |
| 18    | 741097                          | 99.13           | 98.01           | 95.97            | 88.99            | 76.34          |
| 19    | 3044127                         | 97.98           | 95.43           | 91.27            | 80.67            | 65.27          |
| 20    | 1171367                         | 98.91           | 97.63           | 95.37            | 87.98            | 75.4           |
| 21    | 480492                          | 99.36           | 98.09           | 95.69            | 87.59            | 73.81          |
| 22    | 1025109                         | 97.85           | 95.85           | 92.7             | 84.06            | 70.34          |
| X     | 1756723                         | 94.56           | 93.02           | 88.88            | 71.11            | 38.34          |
| Y     | 91440                           | 57.49           | 55.35           | 51.25            | 35.67            | 20.47          |
| Total | 47838451                        | 98.42           | 97.11           | 94.76            | 86.63            | 73.41          |

**S8 Table: Coverage and read depth from whole exome sequencing for the unaffected parent, CIC04840.**

| Chr   | Size of the target regions (bp) | 1X Coverage (%) | 4X Coverage (%) | 10X Coverage (%) | 25X Coverage (%) | Mean depth (X) |
|-------|---------------------------------|-----------------|-----------------|------------------|------------------|----------------|
| 1     | 4738564                         | 98.78           | 97.63           | 95.81            | 90.26            | 93.68          |
| 2     | 3471855                         | 98.97           | 98.08           | 96.61            | 91.76            | 97.28          |
| 3     | 2767223                         | 99.67           | 99.09           | 97.85            | 93.19            | 99.42          |
| 4     | 1871681                         | 99.42           | 98.64           | 97.34            | 92.22            | 98.01          |
| 5     | 2168450                         | 99.09           | 98.18           | 96.72            | 91.67            | 96.33          |
| 6     | 2470987                         | 98.51           | 97.6            | 96.13            | 91.23            | 97.39          |
| 7     | 2280798                         | 97.63           | 96.11           | 94               | 87.62            | 90.05          |
| 8     | 1642199                         | 98.02           | 97              | 95.35            | 90.21            | 92.5           |
| 9     | 1891158                         | 98.58           | 97.3            | 95.27            | 89.26            | 92.34          |
| 10    | 1873001                         | 98.06           | 97.17           | 95.62            | 90.26            | 91.86          |
| 11    | 2832686                         | 99.4            | 98.28           | 96.24            | 90.39            | 92.47          |
| 12    | 2618601                         | 99.34           | 98.44           | 96.73            | 91.19            | 93.54          |
| 13    | 859203                          | 99.43           | 98.74           | 97.41            | 92.5             | 93.86          |
| 14    | 1604688                         | 99.52           | 98.66           | 97.01            | 91.58            | 92.87          |
| 15    | 1672882                         | 97.2            | 96.07           | 94.25            | 88.77            | 91.42          |
| 16    | 2028152                         | 97.36           | 95.57           | 93.04            | 86.18            | 87.08          |
| 17    | 2735968                         | 98.66           | 97.15           | 94.69            | 87.98            | 88.42          |
| 18    | 741097                          | 99.21           | 98.19           | 96.63            | 91.63            | 95.03          |
| 19    | 3044127                         | 98.21           | 95.91           | 92.38            | 83.44            | 78.08          |
| 20    | 1171367                         | 99.08           | 97.94           | 96.08            | 90.47            | 91.97          |
| 21    | 480492                          | 99.42           | 98.44           | 96.62            | 90.2             | 90.13          |
| 22    | 1025109                         | 98.1            | 96.3            | 93.56            | 86.67            | 84.72          |
| X     | 1756723                         | 94.72           | 93.48           | 90.38            | 77.1             | 47.62          |
| Y     | 91440                           | 57.7            | 55.69           | 52.67            | 41.2             | 25.62          |
| Total | 47838451                        | 98.54           | 97.39           | 95.47            | 89.38            | 90.26          |
